# Supplementary material for: Integrated Multi-Omics Analysis of Colorectal Cancer Reveals Mir-20a as a Regulator of Fatty Acid Metabolism in Consensus Molecular Subtype 3
Source: Research Square preprint supplement (doi:10.21203/rs.3.rs-885684/v1), 2021-09-21
Supplement: Supplementary file 1 [file 808ad8a29526d0081708970f.xlsx]

## Sheet: Sheet2
Subtype	symbol	geneid	CNVFreq	DysDegree	DysFreq	MethyFreq	MutFreq	PPI	tf2target	scores	Rank
CMS1	COL11A1	1301	9949	8582	10001	4548	9852	4510	5666	7.6534e-08	1
CMS1	CA1	759	5560	8589	10001	0	2939	0	117	5.31855e-05	2
CMS1	GAD1	2571	9572	8586	10001	499	8847	1931	6459	5.32226e-05	3
CMS1	DUSP4	1846	1943	8528	9984	174	4155	1568	9474	5.61721e-05	4
CMS1	CSMD1	64478	9961	0	7729	4998	9893	0	117	9.44888e-05	5
CMS1	CDH3	1001	464	8578	9925	5181	2939	1568	6831	0.000102115	6
CMS1	ASPM	259266	8880	7309	9397	1332	9837	5233	8880	0.00013536	7
CMS1	THBS2	7058	9949	7927	9838	4244	9402	3640	9099	0.000176097	8
CMS1	EXO1	9156	8880	7914	9946	698	5266	5202	2667	0.000201968	9
CMS1	COL10A1	1300	5560	8590	10001	0	2939	4510	1138	0.000212315	10
CMS1	IGF2BP3	10643	3794	8498	9966	3296	2939	1080	9668	0.000212794	11
CMS1	PMAIP1	5366	5560	8280	9925	1746	748	3165	9380	0.000223742	12
CMS1	PLD1	5337	9572	6335	8338	6239	8537	4893	9668	0.000263462	13
CMS1	AQP8	343	1943	8591	10001	0	1731	0	3740	0.00033141	14
CMS1	SOX11	6664	9572	0	9716	5278	9886	0	9510	0.000334735	15
CMS1	CUL1	8454	9949	2401	3247	2684	8537	5753	6459	0.000376945	16
CMS1	TDO2	6999	9572	7846	9638	6317	7003	1568	8880	0.000429472	17
CMS1	MAD1L1	8379	8880	3801	8516	1	9261	5185	8597	0.000471804	18
CMS1	FBXO5	26271	7436	6638	9749	248	8139	4761	7168	0.000526912	19
CMS1	RCC2	55920	8880	6346	7422	1279	7641	5000	9619	0.000544398	20
CMS1	BMPR2	659	9949	5385	37	2084	9880	3739	7982	0.000588188	21
CMS1	WDR75	84128	8880	6709	8919	490	7641	5497	7168	0.000626041	22
CMS1	MKI67	4288	9572	7019	9435	713	9805	4595	3216	0.000650639	23
CMS1	CA4	762	3794	8572	10001	4746	2939	0	6831	0.000711231	24
CMS1	TGFBR2	7048	7436	6210	7528	1343	7003	4893	8202	0.000727381	25
CMS1	PHLDA1	22822	5560	8267	9838	242	5266	0	9323	0.000750838	26
CMS1	CENPF	1063	8880	7322	7180	1974	9736	5632	4245	0.000767507	27
CMS1	BCL6	604	5560	2048	3725	1488	7641	2464	9705	0.000777098	28
CMS1	NUP205	23165	9572	5858	5974	495	9697	5364	5210	0.000778528	29
CMS1	ETV5	2119	7436	8126	9236	1590	8537	1931	8597	0.000842257	30
CMS1	RRM2	6241	8880	7815	9069	3948	4155	5261	9604	0.000858078	31
CMS1	BRCA1	672	1943	7038	9838	6490	6228	5729	7982	0.000863113	32
CMS1	KIF11	3832	7436	7106	9537	396	4155	5652	9380	0.000944461	33
CMS1	CDC7	8317	8880	7367	9069	319	5266	4099	9547	0.000955847	34
CMS1	GCNT2	2651	7436	8337	9638	5579	9402	2679	9323	0.00105395	35
CMS1	MCM6	4175	7436	7037	8241	1280	8139	5248	3740	0.00119282	36
CMS1	KRT80	144501	3794	8587	9984	5905	2939	1568	4245	0.001319	37
CMS1	DCLRE1A	9937	8880	5688	8810	6386	7641	2854	7168	0.0013427	38
CMS1	BRAF	673	9572	1103	1193	457	9900	5076	4729	0.00140793	39
CMS1	CBX8	57332	5560	7755	8193	2586	8139	4557	9099	0.00142462	40
CMS1	FGFR2	2263	9572	7323	8193	2482	7003	3640	9099	0.0015726	41
CMS1	AMPD2	271	9853	6229	8193	2415	9261	2679	7462	0.00157995	42
CMS1	MMP1	4312	7436	8565	9946	6121	2939	1080	7462	0.00160328	43
CMS1	KIFAP3	22920	7436	5742	6967	2353	7003	4462	7734	0.00161715	44
CMS1	PLCD1	5333	7436	8030	9607	5655	7003	2854	8407	0.00167049	45
CMS1	SPC25	57405	9572	7138	9467	1479	1731	5315	1608	0.00173374	46
CMS1	COL5A2	1290	8880	7531	9036	3564	8139	5018	7734	0.00178453	47
CMS1	WNT5A	7474	7436	6860	8241	3867	8537	3894	9573	0.00180684	48
CMS1	ECT2	1894	8880	7984	9607	0	8537	4344	7734	0.00181808	49
CMS1	LRRN3	54674	9959	0	1507	0	9773	0	9510	0.00194768	50
CMS1	MET	4233	9572	7494	9356	3146	6228	4893	8880	0.00196116	51
CMS1	CHGA	1113	8880	8560	9966	4419	2939	1080	7168	0.00200165	52
CMS1	FN1	2335	9572	2860	1056	3992	9805	5202	9619	0.00208542	53
CMS1	SLC26A2	1836	1943	8569	9966	1960	748	0	8880	0.0021106	54
CMS1	CCNA2	890	5560	7247	9716	325	4155	5751	6459	0.0021106	55
CMS1	PRKCD	5580	7436	5998	8038	2224	7003	4802	6459	0.00222735	56
CMS1	DYNC1H1	1778	8880	540	4065	29	9880	5729	5210	0.00233705	57
CMS1	CDC6	990	1943	7839	9777	914	2939	5632	6831	0.0024663	58
CMS1	EIF4G3	8672	9572	5383	8038	6182	8847	2854	8998	0.00248659	59
CMS1	FOXC1	2296	7436	7940	8961	2389	7641	0	9692	0.00256833	60
CMS1	ESM1	11082	464	8552	10001	5012	2939	0	3216	0.00257487	61
CMS1	DNMT1	1786	464	6823	7982	1973	8139	4557	8202	0.00262114	62
CMS1	TTK	7272	1943	7068	9537	1866	9402	5173	3216	0.00268962	63
CMS1	WNT2	7472	9572	8546	9901	5175	6228	3304	5210	0.00299222	64
CMS1	ADAM12	8038	9572	8467	10001	5349	8139	395	6076	0.00302966	65
CMS1	SPTBN2	6712	464	8330	8844	6138	9261	4557	396	0.00307443	66
CMS1	TNFRSF12A	51330	3794	8042	9716	1382	0	2854	9099	0.00313155	67
CMS1	HIF1A	3091	8880	3831	4208	1481	7641	5220	9190	0.00315104	68
CMS1	CDC5L	988	3794	2051	1507	2268	2939	5767	6459	0.00321903	69
CMS1	CLEC5A	23601	9572	8494	9984	5638	748	4802	3740	0.00334015	70
CMS1	CASQ2	845	9853	8570	8471	5138	7003	0	8597	0.00335634	71
CMS1	SCG2	7857	8880	7874	7629	2117	7003	3534	9432	0.00337557	72
CMS1	MAD2L1	4085	5560	7590	9677	1859	161	5747	8407	0.00343074	73
CMS1	SCNN1B	6338	1943	8567	9966	4914	5266	2854	739	0.00349648	74
CMS1	CHP2	63928	1943	8544	9984	4769	748	395	396	0.00363943	75
CMS1	CENPE	1062	1943	7342	9110	671	8537	5727	1138	0.00364832	76
CMS1	INHBA	3624	3794	8543	10001	0	2939	1080	8998	0.00378519	77
CMS1	PSMD1	5707	8880	3833	919	1434	9261	5505	7168	0.00382267	78
CMS1	CDH13	1012	9853	762	6666	5437	7641	1568	7462	0.00393377	79
CMS1	ANK3	288	8880	7479	8142	6185	9893	4405	2119	0.00399627	80
CMS1	LIG1	3978	3794	6698	9277	254	7641	5000	7462	0.0040503	81
CMS1	ANPEP	290	7436	8195	8693	5624	7641	2219	6831	0.00405629	82
CMS1	TENT5C	54855	7436	7315	7982	1204	9584	0	8880	0.00407208	83
CMS1	STAT1	6772	8880	6783	6967	256	9584	5334	4729	0.0041232	84
CMS1	ADCY6	112	3794	5720	9277	767	8537	4462	8407	0.00413095	85
CMS1	DHRS9	10170	9572	8307	9356	0	748	3304	9190	0.00414701	86
CMS1	KIF20B	9585	8880	6428	7982	596	9077	4629	3740	0.00414906	87
CMS1	NCAM1	4684	7436	8455	9638	4546	9261	4284	7462	0.00417127	88
CMS1	SATB2	23314	9853	7918	9607	1819	5266	395	9632	0.00439061	89
CMS1	CDK6	1021	7436	4432	4284	1812	161	4918	9657	0.00439633	90
CMS1	BLM	641	7436	6953	8294	476	8537	5342	1138	0.004576	91
CMS1	TTLL4	9654	9572	6773	7825	1552	7641	0	7982	0.00458802	92
CMS1	CDC45	8318	1943	7991	9805	0	6228	5386	8998	0.00464444	93
CMS1	VAV3	10451	9853	8064	9575	5298	8537	4157	7462	0.00487167	94
CMS1	KLK6	5653	1943	8593	9946	5593	1731	0	0	0.00491573	95
CMS1	WWOX	51741	9967	1377	3996	0	7641	395	3740	0.00491573	96
CMS1	UBA52	7311	464	4919	495	1600	1731	5768	1608	0.00491573	97
CMS1	ABCA4	24	8880	0	6789	6456	9773	0	8880	0.00491573	98
CMS1	MEF2D	4209	8880	6361	9150	274	4155	3739	8407	0.00494797	99
CMS1	ADAR	103	8880	3650	2357	126	8537	4405	9190	0.00495529	100
CMS2	CDH3	1001	2531	8834	10429	5344	6109	1300	4351	5.2738e-06	1
CMS2	BRCA1	672	8890	7249	10165	6656	9327	5727	8134	2.63842e-05	2
CMS2	COL11A1	1301	8153	8798	10439	4619	10263	5253	7316	3.76792e-05	3
CMS2	DSN1	79980	9675	7583	9884	1210	8288	5440	8134	0.000104707	4
CMS2	TOP2A	7153	9233	7606	10024	716	2321	5453	9859	0.000126075	5
CMS2	AXIN2	8313	9042	8558	9809	2067	10131	3161	8753	0.000171862	6
CMS2	PMEPA1	56937	10121	8074	10068	5822	8288	0	9756	0.000292173	7
CMS2	E2F1	1869	9994	8230	9010	68	0	5068	8462	0.000313787	8
CMS2	EPHB2	2048	10264	7191	8790	150	8288	3625	7316	0.000354878	9
CMS2	ASXL1	171023	10355	6900	9010	528	8288	3327	9682	0.000358823	10
CMS2	FOXQ1	94234	6147	8843	10429	2619	2321	0	2087	0.00043815	11
CMS2	CLCA4	22802	8153	8829	10439	0	6109	495	2849	0.00043815	12
CMS2	SALL4	57167	9841	8814	10396	0	10198	3327	8462	0.000461364	13
CMS2	ETV4	2118	8153	8828	10429	2623	2321	495	7316	0.000488029	14
CMS2	VCAN	1462	6890	3014	7919	5431	10308	5222	10031	0.000540579	15
CMS2	VCL	7414	7547	7255	9772	1466	8288	5104	8753	0.000545042	16
CMS2	GPNMB	10457	5277	8112	9953	5877	9327	0	9152	0.000586253	17
CMS2	PIK3CA	5290	6147	2978	2558	2092	10325	5739	9319	0.000611758	18
CMS2	KLF9	687	15	8444	10226	1071	2321	0	9586	0.000672154	19
CMS2	CCNA2	890	6147	6855	9393	303	2321	5769	6285	0.0008433	20
CMS2	DNMT3B	1789	10305	8170	10268	10	10013	3625	4351	0.000858231	21
CMS2	ESM1	11082	8153	8825	10418	5159	6109	0	2849	0.000911821	22
CMS2	ASPM	259266	3434	7106	9628	1338	10131	5333	9152	0.000925755	23
CMS2	CLU	1191	9381	8439	9488	1305	2321	2978	9152	0.000961772	24
CMS2	CDC5L	988	8890	2192	3548	2394	2321	5788	5690	0.000982994	25
CMS2	TRIB3	57761	9994	8760	9953	136	2321	1818	2849	0.00102733	26
CMS2	AQP8	343	883	8844	10418	0	6109	0	6285	0.00105682	27
CMS2	KIF11	3832	8153	5873	9352	366	6109	5757	9682	0.00108469	28
CMS2	PCBP1	5093	883	339	4546	1791	10131	5629	9859	0.00109219	29
CMS2	CA2	760	7547	8818	10439	3122	6109	0	5690	0.00113329	30
CMS2	EVA1A	84141	386	8751	10268	0	8288	3625	9949	0.00118734	31
CMS2	STX16	8675	10067	7193	7643	389	8288	2756	8134	0.00125064	32
CMS2	CDC6	990	9452	7984	10024	1027	2321	4722	9319	0.00127258	33
CMS2	PRIM2	5558	8624	5794	9329	1389	6109	4772	9464	0.00130358	34
CMS2	TBC1D4	9882	8624	6601	8646	648	8288	2756	8134	0.00131561	35
CMS2	RIOK3	8780	1641	7786	10364	1510	8288	4668	8134	0.00138217	36
CMS2	KAT2B	8850	3434	8117	9141	547	8288	5317	8134	0.0013995	37
CMS2	NXT1	29107	9381	7782	8386	1993	6109	3480	7316	0.00141205	38
CMS2	CENPJ	55835	10194	7013	7096	1746	10013	5268	3602	0.00141875	39
CMS2	DIAPH3	81624	9381	7768	10024	0	9327	1818	9319	0.00147127	40
CMS2	PLCE1	51196	8153	8040	9104	6502	9327	2756	8134	0.00147743	41
CMS2	SQLE	6713	9630	7815	8956	491	8288	3327	6825	0.0015213	42
CMS2	SLC13A3	64849	10264	8812	10149	0	9797	0	7316	0.00154826	43
CMS2	TLR3	7098	9309	8240	8502	925	8288	4019	5054	0.00169192	44
CMS2	GRHL3	57822	10194	8756	10268	3099	2321	0	7316	0.00169495	45
CMS2	MCM3	4172	6890	6655	8924	1940	6109	5577	6825	0.00177727	46
CMS2	ATP11A	23250	9233	8327	10335	0	8288	3843	8976	0.00183405	47
CMS2	CSF1	1435	8153	7460	7369	1871	6109	4440	8462	0.00191021	48
CMS2	TPX2	22974	10389	8250	10226	649	2321	5577	4351	0.00200827	49
CMS2	TRAIP	10293	8153	7400	8535	2560	8288	4822	0	0.00201504	50
CMS2	STIL	6491	6890	6864	7289	1902	8288	2497	6825	0.00211421	51
CMS2	COL6A3	1293	7547	3847	2013	6117	10291	5104	7316	0.00214848	52
CMS2	MAP3K8	1326	386	3419	1797	162	2321	1818	9996	0.00225652	53
CMS2	TCF7L2	6934	7547	5541	9207	1845	10320	3480	9859	0.002278	54
CMS2	IL6ST	3572	8153	7541	9684	3694	8288	4184	10007	0.00234028	55
CMS2	DHRS9	10170	2531	8701	10407	0	2321	3161	9813	0.00235713	56
CMS2	CD177	57126	5277	8831	10407	0	9327	2196	2087	0.00236718	57
CMS2	SMAD3	4088	9381	3107	5946	1760	9327	5364	8753	0.00246142	58
CMS2	POLD1	5424	8153	6643	7151	2788	6109	5411	8753	0.00247839	59
CMS2	UBR4	23352	10264	1541	5234	1214	10131	5568	7761	0.00251339	60
CMS2	SMARCC1	6599	6890	5718	9207	2160	6109	4722	9152	0.00251497	61
CMS2	FBXO32	114907	9515	8509	9233	196	2321	5104	9925	0.0025917	62
CMS2	A2M	2	7547	7792	9628	6386	9797	4822	8462	0.00264941	63
CMS2	IRF4	3662	6890	8505	9207	4882	9327	5037	9319	0.00275937	64
CMS2	CXCL8	3576	6147	8325	10253	0	2321	5157	9464	0.00277852	65
CMS2	PGM1	5236	7547	7095	10212	2130	8288	3625	8753	0.00282463	66
CMS2	TIMP2	7077	7547	7403	7743	457	6109	3927	8462	0.00292486	67
CMS2	PLAC8	51316	5277	8604	10200	3660	2321	2756	9813	0.00298636	68
CMS2	MND1	84057	8890	7570	9865	2079	8288	3749	9152	0.00309525	69
CMS2	INHBA	3624	883	8740	10439	0	10013	2196	8753	0.00313137	70
CMS2	TRIM24	8805	6890	6053	9410	2684	10013	4019	9152	0.00320504	71
CMS2	PMAIP1	5366	4351	7828	10185	1567	6109	2196	9859	0.00320555	72
CMS2	PDE4D	5144	10391	8120	9284	6076	9327	495	7761	0.00322269	73
CMS2	STC2	8614	6147	8713	10185	5417	6109	3327	9813	0.00324307	74
CMS2	CSRP1	1465	5277	8403	10396	1149	2321	0	9319	0.00326839	75
CMS2	POP1	10940	8153	7716	10185	6144	10013	3161	6825	0.00328353	76
CMS2	SLC6A6	6533	4351	8590	10303	1264	2321	0	3602	0.00343493	77
CMS2	KRT15	3866	9143	8001	8518	6259	9327	2196	6825	0.00345235	78
CMS2	ARID1A	8289	10355	1784	2610	2020	10279	4617	8462	0.00361697	79
CMS2	IPF1	3651	10369	8795	9026	1714	2321	1300	716	0.00361697	80
CMS2	ITGA2	3673	6890	6923	9410	2536	8288	4722	6285	0.00372319	81
CMS2	RAF1	5894	5277	1800	9123	197	9327	4668	9464	0.00378343	82
CMS2	NBN	4683	7547	3032	3548	1998	8288	5606	9756	0.00384043	83
CMS2	ACSL6	23305	7547	8793	10429	5050	6109	0	3602	0.00389804	84
CMS2	CA1	759	7547	8841	10386	0	6109	0	0	0.00389804	85
CMS2	UBE2C	11065	10194	8414	9756	1434	6109	5694	5690	0.00390521	86
CMS2	RBL1	5933	10396	7650	8189	2213	2321	4371	7761	0.00400802	87
CMS2	ACADM	34	7547	6993	6841	87	6109	3480	8134	0.00408321	88
CMS2	CDKN2A	1029	2531	8387	9265	5412	8288	4822	8753	0.00415382	89
CMS2	ASCL2	430	9381	8791	10429	5288	2321	0	2849	0.00418944	90
CMS2	CSE1L	1434	9909	7985	10134	657	8288	0	716	0.00422817	91
CMS2	CAMK2G	818	6890	5703	7854	2306	8288	3843	7316	0.00426999	92
CMS2	MAP2K4	6416	8153	5236	7808	2313	10013	4772	6285	0.00429488	93
CMS2	COL10A1	1300	4351	8835	10386	0	6109	4772	1369	0.004339	94
CMS2	PJA2	9867	9233	7489	10121	0	2321	5712	9319	0.00441084	95
CMS2	RFC3	5983	9909	8139	10109	2689	8288	5705	4351	0.00443276	96
CMS2	RRS1	23212	8624	7671	9410	1876	6109	4570	7761	0.00446135	97
CMS2	SHH	6469	9042	8374	9044	74	2321	3480	8462	0.00448394	98
CMS2	RNF114	55905	10121	6618	8143	677	2321	4371	8462	0.00460986	99
CMS2	CAMK2D	817	6147	6761	10268	180	8288	4107	8753	0.00465637	100
CMS3	CDH3	1001	781	8205	9724	4967	7343	1608	4375	9.56368e-06	1
CMS3	ETV4	2118	2661	8183	9695	2477	5024	417	9255	4.13838e-05	2
CMS3	KRT80	144501	6855	8212	9734	5728	1762	1122	5147	0.000126288	3
CMS3	MEIS1	4211	781	7992	9446	3333	9492	2979	9393	0.000161163	4
CMS3	DPT	1805	2661	8209	9734	6068	1762	417	1526	0.000224281	5
CMS3	RCL1	10171	6855	6021	9329	1562	7343	5171	7467	0.000268389	6
CMS3	DUSP4	1846	6855	8094	9710	178	8544	2196	8937	0.000310502	7
CMS3	PGM1	5236	6855	6564	9002	2411	7343	3838	7678	0.000441323	8
CMS3	KIF20B	9585	9495	5751	7576	550	7343	4569	7872	0.000479455	9
CMS3	THBS1	7057	9319	6792	8277	3017	8544	4628	9048	0.000485891	10
CMS3	AQP8	343	6855	8216	9724	0	1762	0	3970	0.000503591	11
CMS3	APC	324	9673	5651	1844	3888	9636	4120	3970	0.000560907	12
CMS3	LPAR1	1902	781	7767	9650	3206	8544	5112	9139	0.000589955	13
CMS3	ITGA2	3673	7982	6707	9414	2288	5024	4230	8349	0.000606093	14
CMS3	MYOM1	8736	9076	8061	9101	6254	9106	0	6737	0.00066946	15
CMS3	PHLDA1	22822	7982	7851	9633	287	7343	0	9048	0.00074801	16
CMS3	ABCA4	24	2661	0	7533	6184	9608	0	8585	0.000751244	17
CMS3	COL11A1	1301	4964	8076	9710	4413	9492	4380	5503	0.000783525	18
CMS3	GRIN2D	2906	7982	8198	9724	3283	5024	3128	3562	0.000820808	19
CMS3	IL6ST	3572	7982	6982	9101	3390	8544	3989	8993	0.000894264	20
CMS3	FOXO3	2309	8693	1860	815	1749	8544	4696	9097	0.000954494	21
CMS3	MYH11	4629	6855	8215	9710	4342	9369	4060	3144	0.000969097	22
CMS3	AXIN2	8313	7982	7816	8057	1934	9492	2196	8585	0.00104244	23
CMS3	CHST15	51363	9076	7383	8716	6082	8544	3265	6737	0.00105274	24
CMS3	ADH1B	125	2661	8194	9734	0	5024	1940	8786	0.00112958	25
CMS3	CCNA2	890	2661	6341	9066	256	8544	5611	6991	0.00112958	26
CMS3	PIK3CA	5290	2661	3318	282	1946	9634	5576	6462	0.00118881	27
CMS3	PJA2	9867	9613	6951	9478	0	5024	5513	8993	0.00120204	28
CMS3	ACTA2	59	9495	7874	9240	6143	7343	0	8349	0.00123532	29
CMS3	SOX9	6662	9076	7560	9478	2900	9622	0	8469	0.00128857	30
CMS3	TCN1	6947	2661	8219	9710	5336	5024	2196	2743	0.0013931	31
CMS3	CTNNA1	1495	7982	1795	8619	488	7343	4428	8349	0.0014137	32
CMS3	CDC5L	988	2661	2440	4122	2152	1762	5623	4773	0.00148701	33
CMS3	B2M	567	9319	5936	5753	152	9369	0	9255	0.00149259	34
CMS3	PTEN	5728	9690	4786	8716	0	9597	5071	8585	0.00151176	35
CMS3	CDC45	8318	4964	7195	9414	0	8544	5278	9181	0.00160002	36
CMS3	RIOK3	8780	7982	6433	9002	1624	5024	4809	8585	0.00160226	37
CMS3	NRAP	4892	9550	0	6371	6160	9369	0	5840	0.00176523	38
CMS3	ABCA8	10351	6855	8186	9710	5146	5024	0	5503	0.0018929	39
CMS3	KIF11	3832	9613	5999	8962	621	7343	5564	9222	0.00189714	40
CMS3	ITGAV	3685	2661	1643	2258	1471	9369	5426	6462	0.00190454	41
CMS3	EPHB2	2048	9319	6505	8461	144	9106	3755	3970	0.00192952	42
CMS3	MKI67	4288	9076	6365	8831	777	9106	4286	2743	0.00199112	43
CMS3	STC2	8614	6855	7972	8755	5125	8544	3265	8871	0.00201997	44
CMS3	PDGFRA	5156	781	7269	9446	3998	9106	4537	9097	0.00208512	45
CMS3	EXO1	9156	6855	7136	9553	696	8544	5231	2337	0.00209438	46
CMS3	DCN	1634	2661	8017	9695	4917	5024	4725	9377	0.00214202	47
CMS3	CBX8	57332	9076	7154	7750	2540	7343	4469	6462	0.00221446	48
CMS3	TOP2A	7153	2661	6856	7833	730	7343	5366	8349	0.00225392	49
CMS3	FGFR2	2263	9076	7096	8576	1791	8544	3675	8469	0.00249156	50
CMS3	CENPE	1062	2661	6857	9153	609	9106	5596	1140	0.00258595	51
CMS3	ANK2	287	2661	8146	9523	4654	9622	4120	798	0.00267315	52
CMS3	CEP72	55722	8693	7494	9523	761	1762	4500	2337	0.00267824	53
CMS3	TNFRSF1A	7132	7982	4680	9181	367	7343	4172	7467	0.00270896	54
CMS3	HSPB8	26353	4964	8193	9695	3879	5024	0	8786	0.00271922	55
CMS3	C2CD4A	145741	7982	8179	9734	0	5024	0	8048	0.00271922	56
CMS3	TCF7L2	6934	9673	3427	3681	1815	9369	4060	9415	0.00278138	57
CMS3	C7	730	6855	8178	9724	4798	5024	417	5147	0.00284927	58
CMS3	PLCD1	5333	6855	7329	8798	5489	7343	2651	6462	0.00285297	59
CMS3	PRDX6	9588	2661	6643	9695	1509	7343	3919	7467	0.00287358	60
CMS3	FUCA1	2517	9319	6907	8178	2185	8544	3128	6160	0.00289088	61
CMS3	ASPM	259266	4964	6903	8423	1352	8544	5205	7872	0.00309079	62
CMS3	ESM1	11082	6855	8196	9695	4763	7343	0	3562	0.00311833	63
CMS3	BRCA1	672	2661	6524	9478	6252	5024	5579	8349	0.00311833	64
CMS3	ITSN1	6453	6855	5124	6479	206	8544	4833	8210	0.0032309	65
CMS3	FOXQ1	94234	4964	8208	9695	2397	1762	0	4773	0.00325734	66
CMS3	SPTBN2	6712	4964	7953	8535	5878	9369	4428	2337	0.00339551	67
CMS3	CA7	766	781	8188	9695	3515	1762	0	1526	0.00339933	68
CMS3	LIG1	3978	7982	6176	8962	258	7343	4882	3970	0.00349578	69
CMS3	SMARCC1	6599	7982	5350	8576	2027	5024	4428	9048	0.00352104	70
CMS3	RAF1	5894	6855	1712	8716	194	9106	5055	8210	0.00363176	71
CMS3	PMAIP1	5366	8693	7002	9501	1454	1762	2651	8692	0.00364605	72
CMS3	RCC2	55920	9319	6152	5930	1363	9106	4982	9324	0.00374008	73
CMS3	BNIP3L	665	9319	392	2643	1435	1762	1122	9280	0.00379571	74
CMS3	S1PR1	1901	4964	7294	8619	3780	8544	5071	8993	0.00394106	75
CMS3	DSC2	1824	8693	6482	9240	1736	8544	2196	8786	0.00397293	76
CMS3	CYP17A1	1586	9613	0	4341	6126	5024	2196	1526	0.00399706	77
CMS3	FBXO32	114907	8693	7601	8535	383	1762	5008	8786	0.00403309	78
CMS3	KIF23	9493	7982	6693	7533	414	5024	5326	7241	0.00409122	79
CMS3	HECTD2	143279	9550	6955	2512	0	5024	5503	9222	0.00411721	80
CMS3	GRM8	2918	9319	7444	7398	6012	9369	4172	3144	0.00411721	81
CMS3	MMP7	4316	2661	8217	9675	3630	5024	3389	6737	0.00415391	82
CMS3	CYP26A1	1592	9613	0	6735	2008	7343	2826	5503	0.00415391	83
CMS3	CHAF1A	10036	6855	6276	6479	440	5024	3389	7241	0.00419501	84
CMS3	KLK10	5655	8693	8177	9675	3302	1762	0	3562	0.00431372	85
CMS3	TIMP2	7077	8693	7439	8619	332	5024	3491	7467	0.00444858	86
CMS3	TG	7038	9319	8157	8619	0	9369	0	3562	0.00445584	87
CMS3	FEM1B	10116	7982	4808	7533	2297	7343	5039	7678	0.00460458	88
CMS3	CA1	759	6855	8206	9675	0	1762	0	515	0.00464223	89
CMS3	FBXO5	26271	7982	5722	9240	225	5024	4469	7678	0.00473879	90
CMS3	INHBA	3624	2661	8043	9724	0	7343	1940	9181	0.00486435	91
CMS3	KLK6	5653	8693	8220	9650	5387	1762	0	0	0.00505259	92
CMS3	NR2F2	7026	8693	2680	3415	2516	5024	0	9463	0.00505259	93
CMS3	RBFOX1	54715	9696	0	3556	0	5024	0	1927	0.00505259	94
CMS3	UBA52	7311	2661	5362	158	1476	1762	5624	1526	0.00505259	95
CMS3	CSRP1	1465	4964	7784	9734	950	1762	417	8210	0.00505259	96
CMS3	BTRC	8945	9613	674	1450	1255	1762	5569	3144	0.00533466	97
CMS3	ENC1	8507	2661	7523	9583	891	8544	0	9097	0.00540813	98
CMS3	E2F1	1869	4964	7377	8384	96	0	4754	9181	0.00566549	99
CMS3	C1QA	712	9319	7509	9066	5211	1762	1608	1140	0.00585093	100
CMS4	CDH3	1001	3526	8818	9965	5117	3997	2599	8050	1.05356e-05	1
CMS4	COL11A1	1301	8773	8837	9996	4565	9597	5131	6299	2.37013e-05	2
CMS4	COL10A1	1300	7814	8839	9996	0	1254	4775	1619	2.37013e-05	3
CMS4	COL1A2	1278	4960	8612	9508	4783	9597	5308	9704	3.49353e-05	4
CMS4	TENT5C	54855	9443	8172	8889	1103	9402	0	8766	8.20473e-05	5
CMS4	COL4A1	1282	9601	8266	9380	0	8101	5166	9003	0.000154385	6
CMS4	TCF7L2	6934	8277	6684	8940	1875	9871	3540	9466	0.000155428	7
CMS4	EVA1A	84141	187	8754	9965	0	1254	2986	9690	0.000159288	8
CMS4	INHBA	3624	867	8829	9996	0	8101	2348	9316	0.000212741	9
CMS4	SHISA2	387914	9927	8744	9982	0	3997	0	6981	0.000220103	10
CMS4	FN1	2335	2043	8120	8422	4045	9847	5569	9714	0.00029454	11
CMS4	VCAN	1462	2043	8565	9965	5397	8980	4869	9557	0.000418643	12
CMS4	BCL6	604	8773	3324	4017	1519	3997	2811	9715	0.000426246	13
CMS4	ASPM	259266	7814	7326	7512	1169	9717	5285	8050	0.000429957	14
CMS4	CA7	766	187	8828	9982	3728	6507	0	3619	0.000477707	15
CMS4	PIK3CA	5290	6193	260	5811	2130	9888	5659	8277	0.000532082	16
CMS4	CENPF	1063	7186	7461	5725	1842	9717	5543	4565	0.000561204	17
CMS4	ESM1	11082	3526	8821	9996	4961	3997	0	6299	0.000589366	18
CMS4	SMIM19	114926	9938	1810	1801	0	1254	0	9704	0.000649559	19
CMS4	ADAM12	8038	8773	8819	9996	5281	8101	0	7287	0.000712656	20
CMS4	ATP8B1	5205	8277	8200	9645	5794	9597	0	8050	0.00072562	21
CMS4	ACADM	34	9601	7671	7249	35	6507	2986	9003	0.000816484	22
CMS4	ETV4	2118	3526	8800	9810	2588	1254	0	9251	0.000824677	23
CMS4	COL12A1	1303	2043	8634	9945	4717	9783	4701	9103	0.00103704	24
CMS4	RCL1	10171	7814	6601	8304	1714	6507	5233	7820	0.00106336	25
CMS4	TRIM25	7706	7186	6073	9026	633	6507	4132	9378	0.00106336	26
CMS4	WNT2	7472	2043	8831	9965	5162	3997	2986	8277	0.0010716	27
CMS4	TPX2	22974	8773	7996	9109	696	3997	5556	4565	0.00113426	28
CMS4	CDC7	8317	9443	5447	5053	383	8980	4701	9429	0.00114549	29
CMS4	TBC1D4	9882	9196	6732	8329	713	8101	2811	8467	0.00118153	30
CMS4	TRIB3	57761	9443	8716	9508	72	1254	2348	1169	0.00123518	31
CMS4	CCNA2	890	7186	4859	8275	314	1254	5667	5022	0.00123541	32
CMS4	KAT2B	8850	3526	7750	8221	489	8101	5285	8893	0.00129497	33
CMS4	PTAFR	5724	9854	4554	6030	6341	1254	5497	1619	0.00139399	34
CMS4	HIP1	3092	3526	7051	8615	686	8980	4588	8622	0.00139625	35
CMS4	MAP2K6	5608	7814	7513	7512	555	6507	4205	6666	0.00147267	36
CMS4	CA1	759	8773	8832	9965	0	1254	0	119	0.00150272	37
CMS4	TLR3	7098	9769	8349	8090	1010	8980	3740	6666	0.00157632	38
CMS4	CDC5L	988	3526	2972	1918	2265	8980	5674	6299	0.00159757	39
CMS4	BRCA1	672	6193	6540	8683	6386	8101	5643	9103	0.0016953	40
CMS4	PHLDA1	22822	4960	8476	9991	248	3997	0	9187	0.00176597	41
CMS4	CKAP2	26586	8277	7640	3813	525	8101	3827	8766	0.0018174	42
CMS4	KIF20B	9585	8773	6104	6907	672	8101	4337	7575	0.00183998	43
CMS4	CXCL1	2919	6193	8432	9747	2605	3997	5131	9251	0.0018975	44
CMS4	CTHRC1	115908	8277	8805	9991	4619	3997	1699	6299	0.00189933	45
CMS4	PCBP1	5093	187	922	3344	1799	9823	5473	9557	0.0019253	46
CMS4	PLCE1	51196	8277	8386	9583	6229	9783	3143	6666	0.0019432	47
CMS4	MFAP2	4237	9769	8683	9796	0	3997	1699	119	0.00195344	48
CMS4	COL5A1	1289	7814	8588	9725	4774	9717	5073	8050	0.00210513	49
CMS4	CDK8	1024	9947	5981	8451	1050	6507	4132	3120	0.00222684	50
CMS4	FGFR2	2263	8277	8254	9146	1840	8101	3827	8467	0.00223809	51
CMS4	COL5A2	1290	6193	8646	9747	3862	6507	5131	9103	0.00225761	52
CMS4	EXO1	9156	7814	7249	9081	716	8980	5320	2607	0.00228954	53
CMS4	DUSP4	1846	7186	8569	9887	179	6507	1212	9103	0.00230394	54
CMS4	TWIST1	7291	2043	8626	9901	5101	3997	2986	9630	0.00231226	55
CMS4	DDX10	1662	7186	6837	6797	381	6507	4984	6981	0.00234454	56
CMS4	PDP1	54704	7814	7007	9081	1619	8980	0	9466	0.0023866	57
CMS4	COL6A3	1293	6193	8101	8535	5815	9823	4984	6666	0.00243921	58
CMS4	DNMT1	1786	6193	6089	6983	2082	8101	4808	8622	0.00246069	59
CMS4	AMPD2	271	8773	7204	8388	2474	6507	2348	6666	0.00248776	60
CMS4	CACNB1	782	7814	7427	7286	1886	8101	2348	8467	0.00254823	61
CMS4	CASP7	840	7186	8181	9842	2027	8101	2348	9003	0.00256493	62
CMS4	CENPE	1062	8277	6781	7390	996	8980	5653	2098	0.00258001	63
CMS4	TEAD4	7004	9601	8247	9703	1385	1254	2056	2607	0.00268261	64
CMS4	DNMT3B	1789	7814	7981	9434	9	9717	3988	6299	0.00273724	65
CMS4	DIAPH3	81624	8773	7659	8914	0	9402	2348	9316	0.00281741	66
CMS4	HMCN1	83872	6193	7099	9982	0	9847	0	4565	0.00282968	67
CMS4	CDKN1A	1026	3526	7655	9583	966	1254	4662	9003	0.00286329	68
CMS4	SLC20A2	6575	9938	5468	6682	0	8101	0	9673	0.00295877	69
CMS4	MAP4K4	9448	867	7098	9508	1904	9717	3644	9103	0.00296581	70
CMS4	CDH11	1009	187	8561	9965	4554	8980	2599	9466	0.00304715	71
CMS4	GCNT2	2651	4960	8686	9827	5709	9597	3418	7287	0.00307643	72
CMS4	DHRS9	10170	3526	8711	9765	0	3997	2056	9610	0.00307643	73
CMS4	PGM1	5236	8277	7907	9810	2111	6507	3644	6299	0.00313161	74
CMS4	FLT1	2321	9947	6774	8570	3742	9402	3827	8467	0.00320957	75
CMS4	MMP7	4316	2043	8835	9945	3760	3997	3540	5891	0.00322545	76
CMS4	ISLR	3671	7814	8008	8914	5951	8101	4132	5891	0.00326388	77
CMS4	PHF20	51230	9601	6356	9235	5845	6507	3284	8766	0.00330108	78
CMS4	SLC4A4	8671	867	8799	9945	6087	6507	462	6299	0.00350345	79
CMS4	BRAF	673	4960	1827	2950	502	9823	5131	7287	0.00364668	80
CMS4	ADAMTS6	11174	6193	8587	9945	604	3997	2599	9643	0.00376743	81
CMS4	CLEC5A	23601	4960	8790	9945	5632	6507	5034	2098	0.00379273	82
CMS4	IL6	3569	2043	8127	8978	3929	8101	5197	9653	0.00386583	83
CMS4	ANGPT2	285	9443	8185	9876	0	8101	2811	9503	0.00392848	84
CMS4	FAT1	2195	9854	3887	1801	2034	9597	1212	9503	0.0039434	85
CMS4	CLDN1	9076	8773	8804	9945	2885	1254	2056	8893	0.00409329	86
CMS4	IPF1	3651	9953	8787	5939	1399	1254	0	755	0.00424779	87
CMS4	SULF1	23213	9692	8659	9924	4321	8980	0	2607	0.00431115	88
CMS4	ITGA2	3673	3526	7546	9508	2397	6507	4389	9316	0.00433893	89
CMS4	STRA6	64220	7814	8827	9945	5010	6507	0	5891	0.00440509	90
CMS4	CTNNB1	1499	3526	4937	363	1680	9823	5114	7820	0.00440509	91
CMS4	RIOK3	8780	6193	7859	9796	1704	6507	4625	6666	0.0044475	92
CMS4	ASXL1	171023	8277	6878	6521	470	9823	3284	9466	0.00446544	93
CMS4	FLNB	2317	3526	6750	9318	1528	9597	1212	9003	0.00450819	94
CMS4	VPS4B	9525	6193	7083	9535	750	6507	4132	6666	0.00451054	95
CMS4	EPHB2	2048	9854	6059	6475	152	8101	3740	6299	0.00458352	96
CMS4	ZFHX4	79776	9692	2706	8769	0	9880	0	9466	0.00470041	97
CMS4	KRT80	144501	867	8834	9945	5765	6507	462	5467	0.00472811	98
CMS4	CLTC	1213	7186	3239	3216	859	8980	5351	9584	0.00487373	99
CMS4	AQP8	343	3526	8830	9945	0	3997	0	399	0.00489382	100
